# Supplementary material
Source: PubMed Central journal article supplement (PMC4306799)
Supplement: peds.2014-2177_peds.2014-2177SupplementaryData.pdf [file peds.2014-2177_peds.2014-2177SupplementaryData.pdf]

# Supplemental Information

## APPENDIX

### Individual and Hospital Characteristics by Region

| Characteristics                | Region A<br>(n = 2017) | Region B<br>(n = 2752) | Region C<br>(n = 2811) | Region D<br>(n = 2500) | Region E<br>(n = 2183) | Region F<br>(n = 3037) | Region G<br>(n = 6831) | Region H<br>(n = 3218) | Region I<br>(n = 2846) | Region J<br>(n = 2731) | Region K<br>(n = 2684) |
|--------------------------------|------------------------|------------------------|------------------------|------------------------|------------------------|------------------------|------------------------|------------------------|------------------------|------------------------|------------------------|
| Antenatal corticosteroid use   |                        |                        |                        |                        |                        |                        |                        |                        |                        |                        |                        |
| No                             | 145 (7)                | 242 (9)                | 292 (10)               | 329 (13)               | 342 (16)               | 488 (16)               | 1299 (19)              | 629 (20)               | 570 (20)               | 556 (20)               | 568 (21)               |
| Yes                            | 1872 (93)              | 2510 (91)              | 2519 (90)              | 2171 (87)              | 1841 (84)              | 2549 (84)              | 5532 (81)              | 2589 (80)              | 2276 (80)              | 2175 (80)              | 2116 (79)              |
| Prenatal care                  |                        |                        |                        |                        |                        |                        |                        |                        |                        |                        |                        |
| No                             | 29 (1)                 | 35 (1)                 | 46 (2)                 | 57 (2)                 | 63 (3)                 | 120 (4)                | 173 (3)                | 116 (4)                | 121 (4)                | 128 (5)                | 103 (4)                |
| Yes                            | 1988 (99)              | 2717 (99)              | 2764 (98)              | 2434 (98)              | 2111 (97)              | 2911 (96)              | 6616 (97)              | 3092 (96)              | 2721 (96)              | 2585 (95)              | 2573 (96)              |
| Prolonged rupture of membranes |                        |                        |                        |                        |                        |                        |                        |                        |                        |                        |                        |
| No                             | 1320 (77)              | 2362 (86)              | 2161 (77)              | 2025 (81)              | 1779 (82)              | 2482 (83)              | 5631 (85)              | 2668 (83)              | 2320 (82)              | 2308 (85)              | 2081 (78)              |
| Yes                            | 388 (23)               | 380 (14)               | 649 (23.1%)            | 470 (19)               | 384 (18)               | 503 (17)               | 1022 (15)              | 533 (17)               | 516 (18)               | 402 (15)               | 598 (22)               |
| Maternal hypertension          |                        |                        |                        |                        |                        |                        |                        |                        |                        |                        |                        |
| No                             | 1163 (68)              | 1874 (68)              | 1982 (71)              | 1882 (76)              | 1622 (75)              | 2234 (75)              | 4996 (75)              | 2334 (73)              | 2125 (76)              | 2001 (74)              | 2036 (76)              |
| Yes                            | 555 (32)               | 865 (32)               | 826 (29)               | 609 (24)               | 543 (25)               | 758 (25)               | 1662 (25)              | 863 (27)               | 678 (24)               | 702 (26)               | 637 (24)               |
| Maternal diabetes              |                        |                        |                        |                        |                        |                        |                        |                        |                        |                        |                        |
| No                             | 1451 (85)              | 2435 (89)              | 2458 (88)              | 2166 (87)              | 1971 (91)              | 2573 (86)              | 6031 (91)              | 2914 (91)              | 2543 (91)              | 2473 (92)              | 2434 (91)              |
| Yes                            | 266 (15)               | 304 (11)               | 350 (13)               | 325 (13)               | 194 (9)                | 419 (14)               | 627 (9)                | 283 (9)                | 260 (9)                | 230 (8)                | 239 (9)                |
| Multiple gestation             |                        |                        |                        |                        |                        |                        |                        |                        |                        |                        |                        |
| No                             | 1397 (69)              | 1936 (70)              | 1895 (67)              | 1759 (70)              | 1581 (72)              | 2052 (68)              | 4764 (70)              | 2347 (73)              | 2191 (77)              | 2083 (76)              | 1971 (73)              |
| Yes                            | 620 (31)               | 816 (30)               | 916 (33)               | 741 (30)               | 602 (28)               | 983 (32)               | 2067 (30)              | 871 (27)               | 655 (23)               | 648 (24)               | 713 (27)               |
| Delivery mode                  |                        |                        |                        |                        |                        |                        |                        |                        |                        |                        |                        |
| Cesarean                       | 1436 (71)              | 2054 (75)              | 2059 (73)              | 1824 (73)              | 1606 (74)              | 2330 (77)              | 5430 (79)              | 2360 (73)              | 2047 (72)              | 2023 (74)              | 1929 (72)              |
| Vaginal                        | 581 (29)               | 698 (25)               | 750 (27)               | 671 (27)               | 576 (26)               | 706 (23)               | 1401 (21)              | 858 (27)               | 799 (28)               | 708 (26)               | 755 (28)               |
| Fetal distress                 |                        |                        |                        |                        |                        |                        |                        |                        |                        |                        |                        |
| No                             | 1497 (87)              | 2238 (82)              | 2209 (79)              | 2075 (83)              | 1706 (79)              | 2048 (69)              | 5291 (80)              | 2621 (82)              | 1662 (59)              | 2024 (75)              | 1954 (73)              |
| Yes                            | 220 (13)               | 500 (18)               | 601 (21)               | 413 (17)               | 448 (21)               | 930 (31)               | 1352 (20)              | 573 (18)               | 1169 (41)              | 675 (25)               | 722 (27)               |
| Maternal age, y                |                        |                        |                        |                        |                        |                        |                        |                        |                        |                        |                        |
| <20                            | 113 (6)                | 185 (7)                | 190 (7)                | 171 (7)                | 205 (9)                | 245 (8)                | 520 (8)                | 304 (10)               | 392 (14)               | 331 (12)               | 292 (11)               |
| 20 to 29                       | 743 (37)               | 985 (36)               | 1018 (36)              | 919 (37)               | 864 (40)               | 1236 (41)              | 2652 (39)              | 1256 (39)              | 1448 (51)              | 1364 (50)              | 1274 (48)              |
| 30 to 39                       | 1039 (52)              | 1413 (51)              | 1316 (47)              | 1191 (48)              | 965 (44)               | 1334 (44)              | 3125 (46)              | 1406 (44)              | 912 (32)               | 916 (34)               | 1003 (37)              |
| ≥40                            | 122 (6)                | 169 (6)                | 286 (10)               | 216 (9)                | 148 (7)                | 220 (7)                | 516 (8)                | 250 (8)                | 93 (3)                 | 120 (4)                | 114 (4)                |
| Race or ethnicity              |                        |                        |                        |                        |                        |                        |                        |                        |                        |                        |                        |
| Black                          | 323 (16)               | 500 (18)               | 461 (16)               | 75 (3)                 | 161 (7)                | 225 (7)                | 712 (10)               | 738 (23)               | 244 (9)                | 382 (14)               | 374 (14)               |
| Hispanic                       | 429 (21)               | 1225 (45)              | 810 (29)               | 1085 (43)              | 1275 (58)              | 1388 (46)              | 3491 (51)              | 1509 (47)              | 1616 (57)              | 1451 (53)              | 760 (28)               |
| White                          | 728 (36)               | 699 (25)               | 1014 (36)              | 700 (28)               | 443 (20)               | 1058 (35)              | 1936 (28)              | 652 (20)               | 748 (26)               | 736 (27)               | 1088 (41)              |
| Asian <sup>a</sup>             | 405 (20)               | 277 (10)               | 452 (16)               | 583 (23)               | 249 (11)               | 282 (9)                | 528 (8)                | 261 (8)                | 162 (6)                | 100 (4)                | 331 (12)               |
| Native American                | 12 (1)                 | 7 (0)                  | 16 (1)                 | 3 (0)                  | 1 (0)                  | 8 (0)                  | 6 (0)                  | 3 (0)                  | 9 (0)                  | 4 (0)                  | 19 (1)                 |
| Other                          | 120 (6)                | 44 (2)                 | 54 (2)                 | 53 (2)                 | 54 (3)                 | 76 (3)                 | 154 (2)                | 55 (2)                 | 67 (2)                 | 58 (2)                 | 112 (4)                |
| Level of care, AAP             |                        |                        |                        |                        |                        |                        |                        |                        |                        |                        |                        |
| Level II                       | —                      | 486 (20)               | 60 (2)                 | 34 (2)                 | 175 (9)                | 516 (18)               | 368 (6)                | 226 (7)                | 88 (5)                 | —                      | 47 (2)                 |
| Level III                      | 1480 (100)             | 1950 (80)              | 1400 (54)              | 1069 (58)              | 1816 (91)              | 822 (29)               | 4652 (72)              | 2760 (87)              | 1199 (61)              | 1957 (75)              | 1384 (51)              |
| Level IV                       | —                      | —                      | 1153 (44)              | 736 (40)               | —                      | —                      | 1058 (16)              | —                      | —                      | 669 (25)               | 1253 (47)              |
| None                           | —                      | —                      | —                      | —                      | —                      | 1514 (53)              | 405 (6)                | 183 (6)                | 672 (34)               | —                      | —                      |
| Teaching hospital              |                        |                        |                        |                        |                        |                        |                        |                        |                        |                        |                        |
| No                             | 1735 (100)             | 2436 (100)             | 2115 (75)              | 2133 (85)              | 1214 (86)              | 2293 (75)              | 5238 (79)              | 1951 (91)              | 1496 (53)              | 1446 (53)              | 2299 (86)              |
| Yes                            | —                      | —                      | 696 (25)               | 367 (15)               | 205 (14)               | 744 (25)               | 1400 (21)              | 199 (9)                | 1350 (47)              | 1285 (47)              | 385 (14)               |
| Urban location                 |                        |                        |                        |                        |                        |                        |                        |                        |                        |                        |                        |
| No                             | 262 (13)               | 164 (6)                | —                      | —                      | 209 (10)               | 45 (2)                 | 112 (2)                | —                      | 355 (12)               | —                      | 51 (2)                 |
| Yes                            | 1755 (87)              | 2588 (94)              | 2811 (100)             | 2500 (100)             | 1974 (90)              | 2992 (98)              | 6719 (98)              | 3218 (100)             | 2491 (88)              | 2731 (100)             | 2633 (98)              |
| Hospital ownership             |                        |                        |                        |                        |                        |                        |                        |                        |                        |                        |                        |
| Government                     | —                      | —                      | 696 (25)               | 487 (20)               | 555 (25)               | 708 (24)               | 835 (12)               | —                      | 376 (13)               | 680 (25)               | 548 (20)               |
| Not for profit                 | 1735 (100)             | 2436 (100)             | 2115 (75)              | 1076 (43)              | 976 (45)               | 2170 (72)              | 5297 (78)              | 2744 (87)              | 1784 (63)              | 1417 (52)              | 2136 (80)              |
| For profit                     | —                      | —                      | —                      | 845 (34)               | 652 (30)               | —                      | 699 (10)               | 226 (7)                | 686 (24)               | 634 (23)               | —                      |
| Other                          | —                      | —                      | —                      | 92 (4)                 | —                      | 114 (4)                | —                      | 199 (6)                | —                      | —                      | —                      |

All data are presented as n (%). —, indicates zero.

<sup>a</sup> Includes Pacific Islanders.
